# Supplementary material for: Expression Pattern of Tenascin-C, Matrilin-2, and Aggrecan in Diseases Affecting the Corneal Endothelium
Source: MDPI journal article supplement (doi:10.3390/jcm11205991), 2022-10-11
Supplement: s1 [file s1]

**Table S1. The results of Kruskal-Wallis tes**

|                                         |                                |                                         |                            |                                         |                           |
|-----------------------------------------|--------------------------------|-----------------------------------------|----------------------------|-----------------------------------------|---------------------------|
| Table Analyzed                          | <b>LAYER_MATRILLIN_CONTROL</b> | Table Analyzed                          | <b>LAYER_MATRILLIN_PBK</b> | Table Analyzed                          | <b>LAYER_MATRILLIN_FD</b> |
|                                         |                                |                                         |                            |                                         |                           |
| <b>Kruskal-Wallis test</b>              |                                | <b>Kruskal-Wallis test</b>              |                            | <b>Kruskal-Wallis test</b>              |                           |
| P value                                 | <0,0001                        | P value                                 | <0,0001                    | P value                                 | 0,1769                    |
| Exact or approximate P value?           | Approximate                    | Exact or approximate P value?           | Approximate                | Exact or approximate P value?           | Approximate               |
| P value summary                         | ****                           | P value summary                         | ****                       | P value summary                         | ns                        |
| Do the medians vary signif. (P < 0.05)? | Yes                            | Do the medians vary signif. (P < 0.05)? | Yes                        | Do the medians vary signif. (P < 0.05)? | No                        |
| Number of groups                        | 7                              | Number of groups                        | 7                          | Number of groups                        | 7                         |
| Kruskal-Wallis statistic                | 68,46                          | Kruskal-Wallis statistic                | 71,26                      | Kruskal-Wallis statistic                | 8,941                     |
| <b>Data summary</b>                     |                                | <b>Data summary</b>                     |                            | <b>Data summary</b>                     |                           |
| Number of treatments (columns)          | 7                              | Number of treatments (columns)          | 7                          | Number of treatments (columns)          | 7                         |
| Number of values (total)                | 77                             | Number of values (total)                | 132                        | Number of values (total)                | 61                        |
|                                         |                                |                                         |                            |                                         |                           |
| Table Analyzed                          | <b>LAYER_TENASCIN_CONTROL</b>  | Table Analyzed                          | <b>LAYER_TENASCIN_PBK</b>  | Table Analyzed                          | <b>LAYER_TENASCIN_FD</b>  |
|                                         |                                |                                         |                            |                                         |                           |
| <b>Kruskal-Wallis test</b>              |                                | <b>Kruskal-Wallis test</b>              |                            | <b>Kruskal-Wallis test</b>              |                           |
| P value                                 | 0,0016                         | P value                                 | <0,0001                    | P value                                 | <0,0001                   |
| Exact or approximate P value?           | Approximate                    | Exact or approximate P value?           | Approximate                | Exact or approximate P value?           | Approximate               |
| P value summary                         | **                             | P value summary                         | ****                       | P value summary                         | ****                      |

|                                         |                               |                                         |                            |                                         |                          |
|-----------------------------------------|-------------------------------|-----------------------------------------|----------------------------|-----------------------------------------|--------------------------|
| Do the medians vary signif. (P < 0.05)? | Yes                           | Do the medians vary signif. (P < 0.05)? | Yes                        | Do the medians vary signif. (P < 0.05)? | Yes                      |
| Number of groups                        | 7                             | Number of groups                        | 7                          | Number of groups                        | 7                        |
| Kruskal-Wallis statistic                | 21,29                         | Kruskal-Wallis statistic                | 67,03                      | Kruskal-Wallis statistic                | 28,59                    |
| <b>Data summary</b>                     |                               | <b>Data summary</b>                     |                            | <b>Data summary</b>                     |                          |
| Number of treatments (columns)          | 7                             | Number of treatments (columns)          | 7                          | Number of treatments (columns)          | 7                        |
| Number of values (total)                | 69                            | Number of values (total)                | 131                        | Number of values (total)                | 53                       |
|                                         |                               |                                         |                            |                                         |                          |
| Table Analyzed                          | <b>LAYER_AGGRECAN_CONTROL</b> | Table Analyzed                          | <b>LAYER_AGGREC AN_PBK</b> | Table Analyzed                          | <b>LAYER_AGGRECAN_FD</b> |
|                                         |                               |                                         |                            |                                         |                          |
| <b>Kruskal-Wallis test</b>              |                               | <b>Kruskal-Wallis test</b>              |                            | <b>Kruskal-Wallis test</b>              |                          |
| P value                                 | <0,0001                       | P value                                 | <0,0001                    | P value                                 | 0,002                    |
| Exact or approximate P value?           | Approximate                   | Exact or approximate P value?           | Approximate                | Exact or approximate P value?           | Approximate              |
| P value summary                         | ****                          | P value summary                         | ****                       | P value summary                         | **                       |
| Do the medians vary signif. (P < 0.05)? | Yes                           | Do the medians vary signif. (P < 0.05)? | Yes                        | Do the medians vary signif. (P < 0.05)? | Yes                      |
| Number of groups                        | 7                             | Number of groups                        | 7                          | Number of groups                        | 7                        |
| Kruskal-Wallis statistic                | 50,56                         | Kruskal-Wallis statistic                | 36,28                      | Kruskal-Wallis statistic                | 20,78                    |
| <b>Data summary</b>                     |                               | <b>Data summary</b>                     |                            | <b>Data summary</b>                     |                          |
| Number of treatments                    | 7                             | Number of treatments                    | 7                          | Number of treatments                    | 7                        |

|                                   |    |                                   |     |                                   |    |
|-----------------------------------|----|-----------------------------------|-----|-----------------------------------|----|
| ts<br>(column<br>s)               |    | ts<br>(column<br>s)               |     | ts<br>(column<br>s)               |    |
| Number<br>of<br>values<br>(total) | 69 | Number<br>of<br>values<br>(total) | 131 | Number<br>of<br>values<br>(total) | 54 |
