# Supplementary material for: Expression Pattern of Tenascin-C, Matrilin-2, and Aggrecan in Diseases Affecting the Corneal Endothelium
Source: MDPI journal article supplement (doi:10.3390/jcm11205991), 2022-10-11
Supplement: s1 [file s1]

## SUPPLEMENTARY MATERIAL ONLINE

### Expression pattern of tenascin-C, matrilin-2, and aggrecan in corneal endothelial pathological conditions

Gréta Varkoly <sup>1</sup>, Tibor G. Hortobágyi <sup>2</sup>, Enikő Gebri <sup>3</sup>, János Bencze <sup>4</sup>, Tibor Hortobágyi <sup>5,6,7,8,\*,†</sup>  
and László Módos, Jr. <sup>9,†</sup>

**Table S1. The results of Kruskal-Wallis test**

| Table Analyzed                          | LAYER_MATRILLIN_CONTROL | Table Analyzed                          | LAYER_MATRILLIN_PBK | Table Analyzed                          | LAYER_MATRILIN_FD |
|-----------------------------------------|-------------------------|-----------------------------------------|---------------------|-----------------------------------------|-------------------|
|                                         |                         |                                         |                     |                                         |                   |
| <i>Kruskal-Wallis test</i>              |                         | <i>Kruskal-Wallis test</i>              |                     | <i>Kruskal-Wallis test</i>              |                   |
| P value                                 | <0,0001                 | P value                                 | <0,0001             | P value                                 | 0,1769            |
| Exact or approximate P value?           | Approximate             | Exact or approximate P value?           | Approximate         | Exact or approximate P value?           | Approximate       |
| P value summary                         | ****                    | P value summary                         | ****                | P value summary                         | ns                |
| Do the medians vary signif. (P < 0.05)? | Yes                     | Do the medians vary signif. (P < 0.05)? | Yes                 | Do the medians vary signif. (P < 0.05)? | No                |
| Number of groups                        | 7                       | Number of groups                        | 7                   | Number of groups                        | 7                 |
| Kruskal-Wallis statistic                | 68,46                   | Kruskal-Wallis statistic                | 71,26               | Kruskal-Wallis statistic                | 8,941             |
| <i>Data summary</i>                     |                         | <i>Data summary</i>                     |                     | <i>Data summary</i>                     |                   |
| Number of treatments (columns)          | 7                       | Number of treatments (columns)          | 7                   | Number of treatments (columns)          | 7                 |

|                                         |                        |                                         |                    |                                         |                   |
|-----------------------------------------|------------------------|-----------------------------------------|--------------------|-----------------------------------------|-------------------|
| Number of values (total)                | 77                     | Number of values (total)                | 132                | Number of values (total)                | 61                |
|                                         |                        |                                         |                    |                                         |                   |
| Table Analyzed                          | LAYER_TENASCIN_CONTROL | Table Analyzed                          | LAYER_TENASCIN_PBK | Table Analyzed                          | LAYER_TENASCIN_FD |
|                                         |                        |                                         |                    |                                         |                   |
| <i>Kruskal-Wallis test</i>              |                        | <i>Kruskal-Wallis test</i>              |                    | <i>Kruskal-Wallis test</i>              |                   |
| P value                                 | 0,0016                 | P value                                 | <0,0001            | P value                                 | <0,0001           |
| Exact or approximate P value?           | Approximate            | Exact or approximate P value?           | Approximate        | Exact or approximate P value?           | Approximate       |
| P value summary                         | **                     | P value summary                         | ****               | P value summary                         | ****              |
| Do the medians vary signif. (P < 0.05)? | Yes                    | Do the medians vary signif. (P < 0.05)? | Yes                | Do the medians vary signif. (P < 0.05)? | Yes               |
| Number of groups                        | 7                      | Number of groups                        | 7                  | Number of groups                        | 7                 |
| Kruskal-Wallis statistic                | 21,29                  | Kruskal-Wallis statistic                | 67,03              | Kruskal-Wallis statistic                | 28,59             |
| <i>Data summary</i>                     |                        | <i>Data summary</i>                     |                    | <i>Data summary</i>                     |                   |
| Number of treatments (columns)          | 7                      | Number of treatments (columns)          | 7                  | Number of treatments (columns)          | 7                 |
| Number of values (total)                | 69                     | Number of values (total)                | 131                | Number of values (total)                | 53                |
|                                         |                        |                                         |                    |                                         |                   |
| Table Analyzed                          | LAYER_AGGRECAN_CONTROL | Table Analyzed                          | LAYER_AGGRECAN_PBK | Table Analyzed                          | LAYER_AGGRECAN_FD |
|                                         |                        |                                         |                    |                                         |                   |

|                                         |             |                                         |             |                                         |             |
|-----------------------------------------|-------------|-----------------------------------------|-------------|-----------------------------------------|-------------|
| <i>Kruskal-Wallis test</i>              |             | <i>Kruskal-Wallis test</i>              |             | <i>Kruskal-Wallis test</i>              |             |
| P value                                 | <0,0001     | P value                                 | <0,0001     | P value                                 | 0,002       |
| Exact or approximate P value?           | Approximate | Exact or approximate P value?           | Approximate | Exact or approximate P value?           | Approximate |
| P value summary                         | ****        | P value summary                         | ****        | P value summary                         | **          |
| Do the medians vary signif. (P < 0.05)? | Yes         | Do the medians vary signif. (P < 0.05)? | Yes         | Do the medians vary signif. (P < 0.05)? | Yes         |
| Number of groups                        | 7           | Number of groups                        | 7           | Number of groups                        | 7           |
| Kruskal-Wallis statistic                | 50,56       | Kruskal-Wallis statistic                | 36,28       | Kruskal-Wallis statistic                | 20,78       |
| <i>Data summary</i>                     |             | <i>Data summary</i>                     |             | <i>Data summary</i>                     |             |
| Number of treatments (columns)          | 7           | Number of treatments (columns)          | 7           | Number of treatments (columns)          | 7           |
| Number of values (total)                | 69          | Number of values (total)                | 131         | Number of values (total)                | 54          |

**Table S2. Comparison of tenascin-C expression in different corneal layers within the investigated groups**

|                                           | Control | PBK     | FECD   |
|-------------------------------------------|---------|---------|--------|
| Epithelium vs Bowman's membrane           | 0.0217  | 0.0013  | ns     |
| Epithelium vs. Anterior stroma            | ns      | ns      | ns     |
| Epithelium vs. Middle stroma              | 0.0194  | ns      | ns     |
| Epithelium vs. Posterior stroma           | ns      | ns      | ns     |
| Epithelium vs. Descemet's membrane        | 0.0033  | <0.0001 | 0.0078 |
| Epithelium vs. Endothelium                | ns      | ns      | ns     |
| Bowman's membrane vs. Anterior stroma     | ns      | ns      | ns     |
| Bowman's membrane vs. Middle stroma       | ns      | ns      | ns     |
| Bowman's membrane vs. Posterior stroma    | ns      | 0.0005  | ns     |
| Bowman's membrane vs. Descemet's membrane | ns      | ns      | ns     |

|                                             |    |         |         |
|---------------------------------------------|----|---------|---------|
| Bowman's membrane<br>vs. Endothelium        | ns | ns      | ns      |
| Anterior stroma vs.<br>Middle stroma        | ns | ns      | ns      |
| Anterior stroma vs.<br>Posterior stroma     | ns | ns      | ns      |
| Anterior stroma vs.<br>Descemet's membrane  | ns | <0.0001 | ns      |
| Anterior stroma vs.<br>Endothelium          | ns | ns      | ns      |
| Middle stroma vs.<br>Posterior stroma       | ns | ns      | ns      |
| Middle stroma vs.<br>Descemet's membrane    | ns | <0.0001 | ns      |
| Middle stroma vs.<br>Endothelium            | ns | ns      | ns      |
| Posterior stroma vs.<br>Descemet's membrane | ns | <0.0001 | <0.0001 |
| Posterior stroma vs.<br>Endothelium         | ns | 0.0373  | ns      |
| Descemet's membrane<br>vs. Endothelium      | ns | 0.0482  | 0.0187  |

---

PBK=pseudophakic bullous keratopathy, FECD=Fuchs' endothelial corneal dystrophy, ns=no significance. Red numbers indicate significant adjusted p values.

**Table S3. Comparison of matrilin-2 expression in different corneal layers within the investigated groups**

|                                           | Control | PBK     | FECD |
|-------------------------------------------|---------|---------|------|
| Epithelium vs Bowman's membrane           | 0.0012  | <0.0001 | ns   |
| Epithelium vs. Anterior stroma            | <0.0001 | <0.0001 | ns   |
| Epithelium vs. Middle stroma              | <0.0001 | <0.0001 | ns   |
| Epithelium vs. Posterior stroma           | <0.0001 | <0.0001 | ns   |
| Epithelium vs. Descemet's membrane        | <0.0001 | <0.0001 | ns   |
| Epithelium vs. Endothelium                | ns      | 0.0022  | ns   |
| Bowman's membrane vs. Anterior stroma     | ns      | ns      | ns   |
| Bowman's membrane vs. Middle stroma       | ns      | ns      | ns   |
| Bowman's membrane vs. Posterior stroma    | ns      | ns      | ns   |
| Bowman's membrane vs. Descemet's membrane | ns      | ns      | ns   |

|                                             |         |        |    |
|---------------------------------------------|---------|--------|----|
| Bowman's membrane<br>vs. Endothelium        | 0.0002  | ns     | ns |
| Anterior stroma vs.<br>Middle stroma        | ns      | ns     | ns |
| Anterior stroma vs.<br>Posterior stroma     | ns      | ns     | ns |
| Anterior stroma vs.<br>Descemet's membrane  | ns      | ns     | ns |
| Anterior stroma vs.<br>Endothelium          | <0.0001 | ns     | ns |
| Middle stroma vs.<br>Posterior stroma       | ns      | ns     | ns |
| Middle stroma vs.<br>Descemet's membrane    | ns      | ns     | ns |
| Middle stroma vs.<br>Endothelium            | <0.0001 | 0.0121 | ns |
| Posterior stroma vs.<br>Descemet's membrane | ns      | ns     | ns |
| Posterior stroma vs.<br>Endothelium         | <0.0001 | ns     | ns |
| Descemet's membrane<br>vs. Endothelium      | <0.0001 | 0.0343 | ns |

---

PBK=pseudophakic bullous keratopathy, FECD=Fuchs' endothelial corneal dystrophy, ns=no significance. Red numbers indicate significant adjusted p values.

**Table S4. Comparison of aggrecan expression in different corneal layers within the investigated groups**

|                                        | Control | PBK     | FECD   |
|----------------------------------------|---------|---------|--------|
| Epithelium vs Bowman's membrane        | ns      | ns      | ns     |
| Epithelium vs. Anterior stroma         | <0.0001 | ns      | ns     |
| Epithelium vs. Middle stroma           | <0.0001 | ns      | ns     |
| Epithelium vs. Posterior stroma        | <0.0001 | ns      | ns     |
| Epithelium vs. Descemet's membrane     | <0.0001 | <0.0001 | ns     |
| Epithelium vs. Endothelium             | ns      | ns      | ns     |
| Bowman's membrane vs. Anterior stroma  | 0.0442  | ns      | ns     |
| Bowman's membrane vs. Middle stroma    | 0.0442  | ns      | ns     |
| Bowman's membrane vs. Posterior stroma | 0.0442  | ns      | ns     |
| Bowman's membrane vs. Descemet's       | 0.0442  | 0.0004  | 0.0115 |



membrane

|                                             |        |        |        |
|---------------------------------------------|--------|--------|--------|
| Bowman's membrane<br>vs. Endothelium        | ns     | ns     | ns     |
| Anterior stroma vs.<br>Middle stroma        | ns     | ns     | ns     |
| Anterior stroma vs.<br>Posterior stroma     | ns     | ns     | ns     |
| Anterior stroma vs.<br>Descemet's membrane  | ns     | ns     | ns     |
| Anterior stroma vs.<br>Endothelium          | 0.0079 | ns     | ns     |
| Middle stroma vs.<br>Posterior stroma       | ns     | ns     | ns     |
| Middle stroma vs.<br>Descemet's membrane    | ns     | ns     | ns     |
| Middle stroma vs.<br>Endothelium            | 0.0079 | ns     | ns     |
| Posterior stroma vs.<br>Descemet's membrane | ns     | 0.004  | 0.0364 |
| Posterior stroma vs.<br>Endothelium         | 0.0079 | ns     | ns     |
| Descemet's membrane<br>vs. Endothelium      | 0.0079 | 0.0009 | ns     |

---

PBK=pseudophakic bullous keratopathy, FECD=Fuchs' endothelial corneal dystrophy, ns=no significance. Red numbers indicate significant adjusted p values.
