# Supplementary material for: Expression Pattern of Tenascin-C, Matrilin-2, and Aggrecan in Diseases Affecting the Corneal Endothelium
Source: MDPI journal article supplement (doi:10.3390/jcm11205991), 2022-10-11
Supplement: s1 [file s1]

**Table S4. Comparison of aggrecan expression in different corneal layers within the investigated groups**

|                                           | Control           | PBK               | FECD          |
|-------------------------------------------|-------------------|-------------------|---------------|
| Epithelium vs Bowman's membrane           | ns                | ns                | ns            |
| Epithelium vs. Anterior stroma            | <b>&lt;0.0001</b> | ns                | ns            |
| Epithelium vs. Middle stroma              | <b>&lt;0.0001</b> | ns                | ns            |
| Epithelium vs. Posterior stroma           | <b>&lt;0.0001</b> | ns                | ns            |
| Epithelium vs. Descemet's membrane        | <b>&lt;0.0001</b> | <b>&lt;0.0001</b> | ns            |
| Epithelium vs. Endothelium                | ns                | ns                | ns            |
| Bowman's membrane vs. Anterior stroma     | <b>0.0442</b>     | ns                | ns            |
| Bowman's membrane vs. Middle stroma       | <b>0.0442</b>     | ns                | ns            |
| Bowman's membrane vs. Posterior stroma    | <b>0.0442</b>     | ns                | ns            |
| Bowman's membrane vs. Descemet's membrane | <b>0.0442</b>     | <b>0.0004</b>     | <b>0.0115</b> |
| Bowman's membrane vs. Endothelium         | ns                | ns                | ns            |
| Anterior stroma vs. Middle stroma         | ns                | ns                | ns            |
| Anterior stroma vs. Posterior stroma      | ns                | ns                | ns            |
| Anterior stroma vs. Descemet's membrane   | ns                | ns                | ns            |
| Anterior stroma vs. Endothelium           | <b>0.0079</b>     | ns                | ns            |
| Middle stroma vs. Posterior stroma        | ns                | ns                | ns            |

|                                             |               |               |               |
|---------------------------------------------|---------------|---------------|---------------|
| Middle stroma vs.<br>Descemet's membrane    | ns            | ns            | ns            |
| Middle stroma vs.<br>Endothelium            | <b>0.0079</b> | ns            | ns            |
| Posterior stroma vs.<br>Descemet's membrane | ns            | <b>0.004</b>  | <b>0.0364</b> |
| Posterior stroma vs.<br>Endothelium         | <b>0.0079</b> | ns            | ns            |
| Descemet's membrane<br>vs. Endothelium      | <b>0.0079</b> | <b>0.0009</b> | ns            |

---

PBK=pseudophakic bullous keratopathy, FECD=Fuchs' endothelial corneal dystrophy, ns=no significance. Red numbers indicate significant adjusted p values.
