# Supplementary material for: Expression Pattern of Tenascin-C, Matrilin-2, and Aggrecan in Diseases Affecting the Corneal Endothelium
Source: MDPI journal article supplement (doi:10.3390/jcm11205991), 2022-10-11
Supplement: s1 [file s1]

**Table S2. Comparison of tenascin-C expression in different corneal layers within the investigated groups**

|                                           | Control       | PBK               | FECD          |
|-------------------------------------------|---------------|-------------------|---------------|
| Epithelium vs Bowman's membrane           | <b>0.0217</b> | <b>0.0013</b>     | ns            |
| Epithelium vs. Anterior stroma            | ns            | ns                | ns            |
| Epithelium vs. Middle stroma              | <b>0.0194</b> | ns                | ns            |
| Epithelium vs. Posterior stroma           | ns            | ns                | ns            |
| Epithelium vs. Descemet's membrane        | <b>0.0033</b> | <b>&lt;0.0001</b> | <b>0.0078</b> |
| Epithelium vs. Endothelium                | ns            | ns                | ns            |
| Bowman's membrane vs. Anterior stroma     | ns            | ns                | ns            |
| Bowman's membrane vs. Middle stroma       | ns            | ns                | ns            |
| Bowman's membrane vs. Posterior stroma    | ns            | <b>0.0005</b>     | ns            |
| Bowman's membrane vs. Descemet's membrane | ns            | ns                | ns            |
| Bowman's membrane vs. Endothelium         | ns            | ns                | ns            |
| Anterior stroma vs. Middle stroma         | ns            | ns                | ns            |
| Anterior stroma vs. Posterior stroma      | ns            | ns                | ns            |
| Anterior stroma vs. Descemet's membrane   | ns            | <b>&lt;0.0001</b> | ns            |
| Anterior stroma vs. Endothelium           | ns            | ns                | ns            |
| Middle stroma vs. Posterior stroma        | ns            | ns                | ns            |

|                                             |    |                   |                   |
|---------------------------------------------|----|-------------------|-------------------|
| Middle stroma vs.<br>Descemet's membrane    | ns | <b>&lt;0.0001</b> | ns                |
| Middle stroma vs.<br>Endothelium            | ns | ns                | ns                |
| Posterior stroma vs.<br>Descemet's membrane | ns | <b>&lt;0.0001</b> | <b>&lt;0.0001</b> |
| Posterior stroma vs.<br>Endothelium         | ns | <b>0.0373</b>     | ns                |
| Descemet's membrane<br>vs. Endothelium      | ns | <b>0.0482</b>     | <b>0.0187</b>     |

---

PBK=pseudophakic bullous keratopathy, FECD=Fuchs' endothelial corneal dystrophy, ns=no significance. Red numbers indicate significant adjusted p values.
